# Supplementary material for: Bacterial growth monitored by two-dimensional tandem mass spectrometry
Source: Royal Society of Chemistry journal article supplement (doi:10.1039/d1an01901e), 2022-01-01
Supplement: d1an01901e3.pdf [file d1an01901e3.pdf]

Supplementary Information

**Bacterial Growth Monitored by Two-Dimensional Tandem Mass Spectrometry**

Lucas J. Szalwinski; L. Edwin Gonzalez; Nicolás M. Morato; Brett M. Marsh; R. Graham Cooks\*

Purdue University Department of Chemistry, West Lafayette, IN 47907

\*email: [cooks@purdue.edu](mailto:cooks@purdue.edu)

**Table of Contents:**

**Figure S1.** Growth curve and 2D MS/MS spectra over time for *E. coli* **Page S2**

**Figure S2.** Rolling average of 2D MS/MS spectra acquired from a microscope slide containing *E. coli* and *P. aeruginosa* **Page S3**

Note: If the figures in this document appear to change over time, .mp4 files are available with file names corresponding with the associated figure.

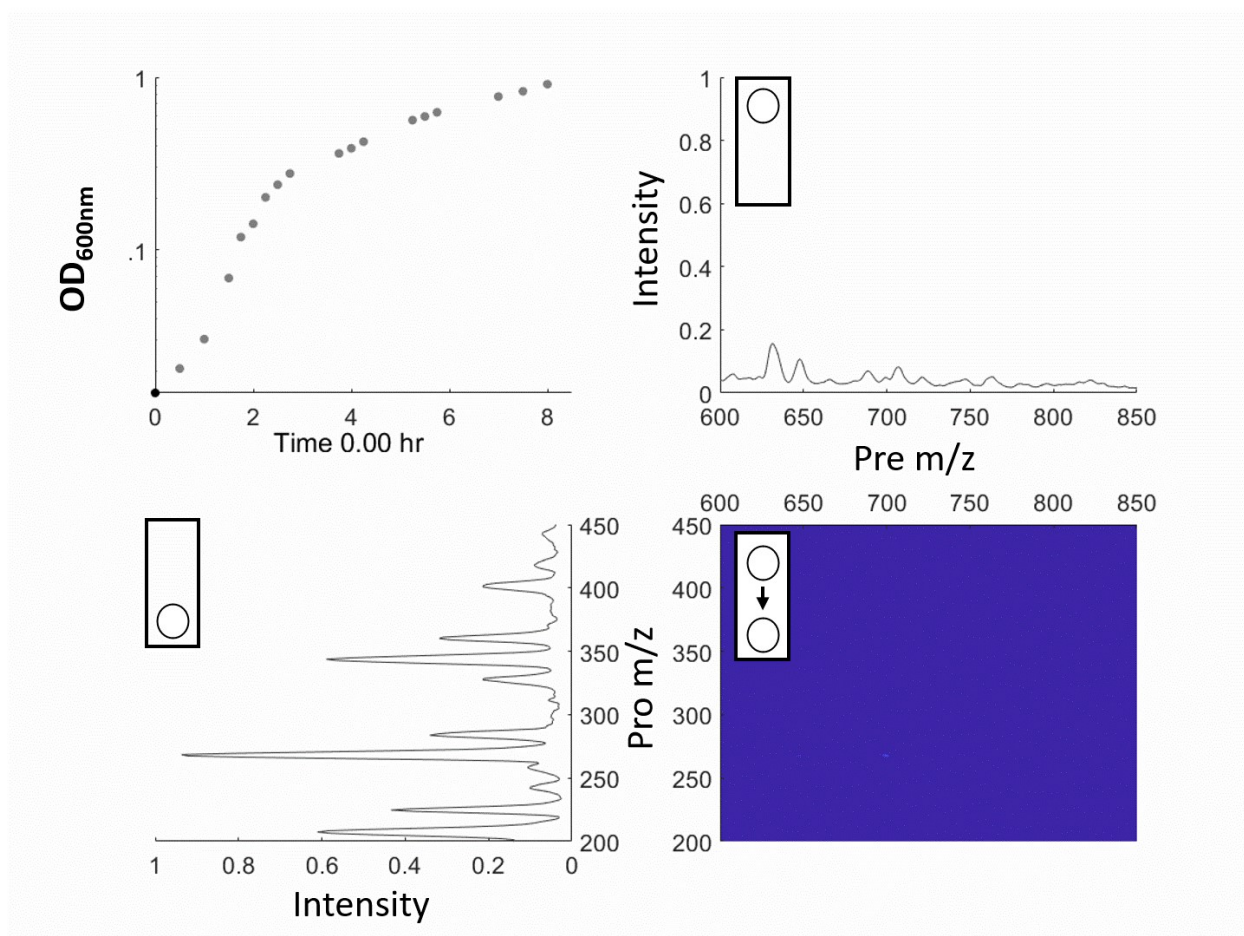

Figure S1. (top left) Growth curve of *E. coli* over 8 hours. (top right) Anterior mass spectrum obtained by summing all product ions from each designated precursor ion in the 2D MS/MS mass spectrum. (bottom left) Posterior mass spectrum obtained by summing all precursor ions which produce each designated product ion in the 2D MS/MS mass spectrum. (bottom right) 2D MS/MS mass spectrum focused on the lipid mass region. All plots can be seen in the video to change as a function of the time indicated in the top left plot.

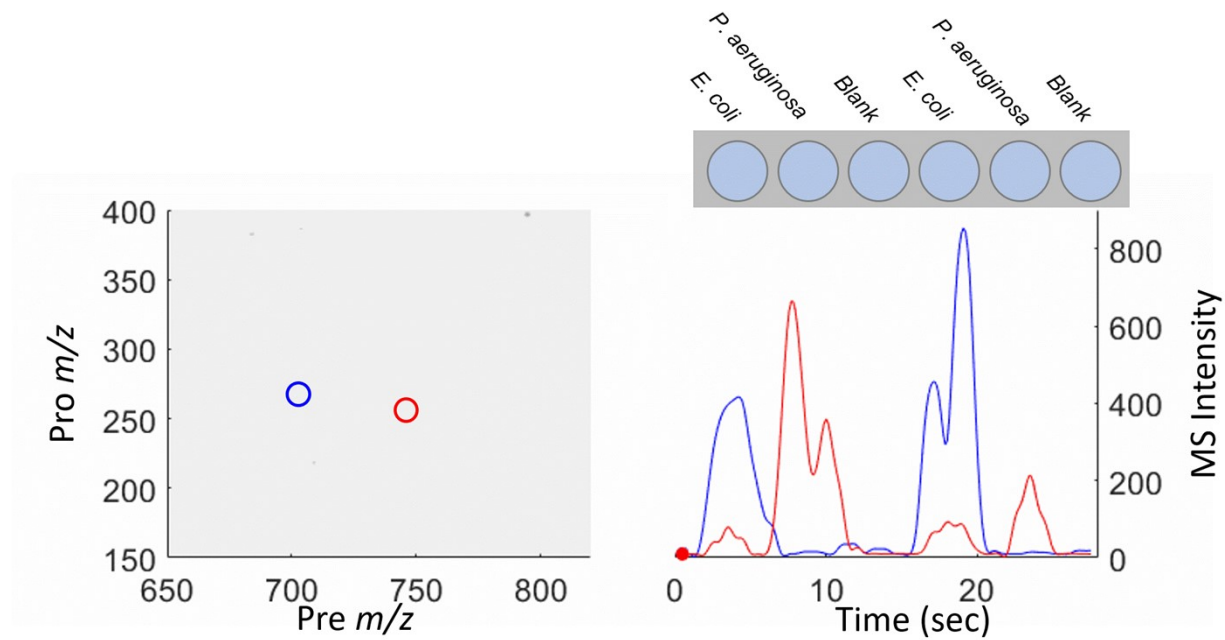

Figure S2. (left) Rolling average of three 2D MS/MS spectra acquired as the DESI spray is rastered across five wells containing (left to right) *E. coli* replicate 1; *Pseudomonas aeruginosa* replicate 1; empty well; *E. coli* replicate 2; *Pseudomonas aeruginosa* replicate 2. (right) Extracted ion signal for two lipid fragments present predominantly in *E. coli* (red) and *P. aeruginosa* (blue). The plots are updated in time at a rate that matches the sample analysis rate.
